# Supplementary material for: Structural and Superconducting Proximity Effect of SnPb Bimetallic Nanoalloys
Source: MDPI journal article supplement (doi:10.3390/nano12234323), 2022-12-05

## **Supplementary information**

### **Structural and Superconducting Proximity Effect of SnPb Bimetallic Alloys**

Ashish Chhaganlal Gandhi,<sup>a,b</sup> K. Manjunatha,<sup>a</sup> Ting-Shan Chan,<sup>b</sup> and Sheng Yun Wu<sup>a,\*</sup>

<sup>a</sup> Department of Physics, National Dong Hwa University, Hualien 97401, Taiwan

<sup>b</sup> Department of Electrical Engineering, National Tsing Hua University, Hsinchu 30013, Taiwan

<sup>c</sup> National Synchrotron Radiation Research Center, Hsinchu 30076, Taiwan

\*Corresponding author: sywu@mail.ndhu.edu.tw

**Figure S1** (a)-(k) The EDS mapped SEM images of  $\text{Sn}_r\text{Pb}_{1-r}$  bimetallic nanoalloys, where red and green represent the atomic percent of Pb and Sn, respectively. The EDS mapping images of  $\text{Sn}_r\text{Pb}_{1-r}$  nanoalloy show the distribution of segregated Sn (bright green color) and Pb (red color) elements with grain size varying from  $\langle d \rangle = 121(10) \sim 46(3)$  nm.

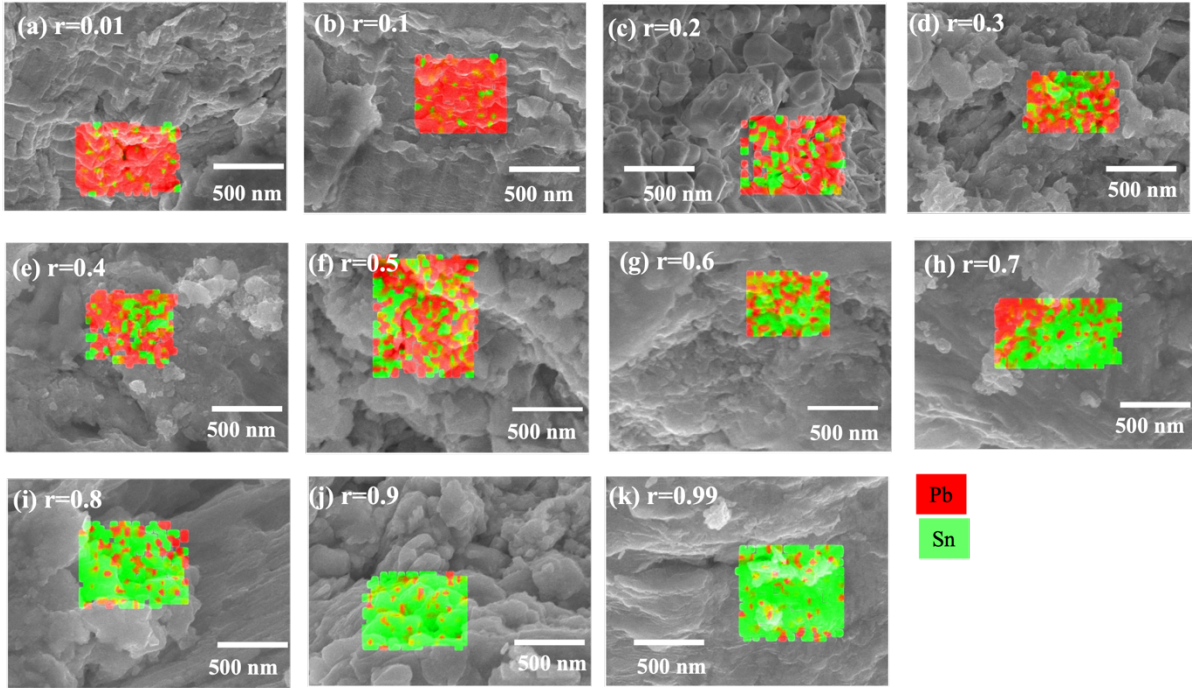

**Figure S2** (a)–(f) Temperature dependence of magnetization measured between 2 to 8 K in an external magnetic field of  $H_a = 100$  Oe in the ZFC and FC modes for  $r = 0.1, 0.2, 0.3, 0.4, 0.5$  and  $0.6$  nanoalloys.

The red and blue solid curve presents the fitted curve of the modified London expression to the data.

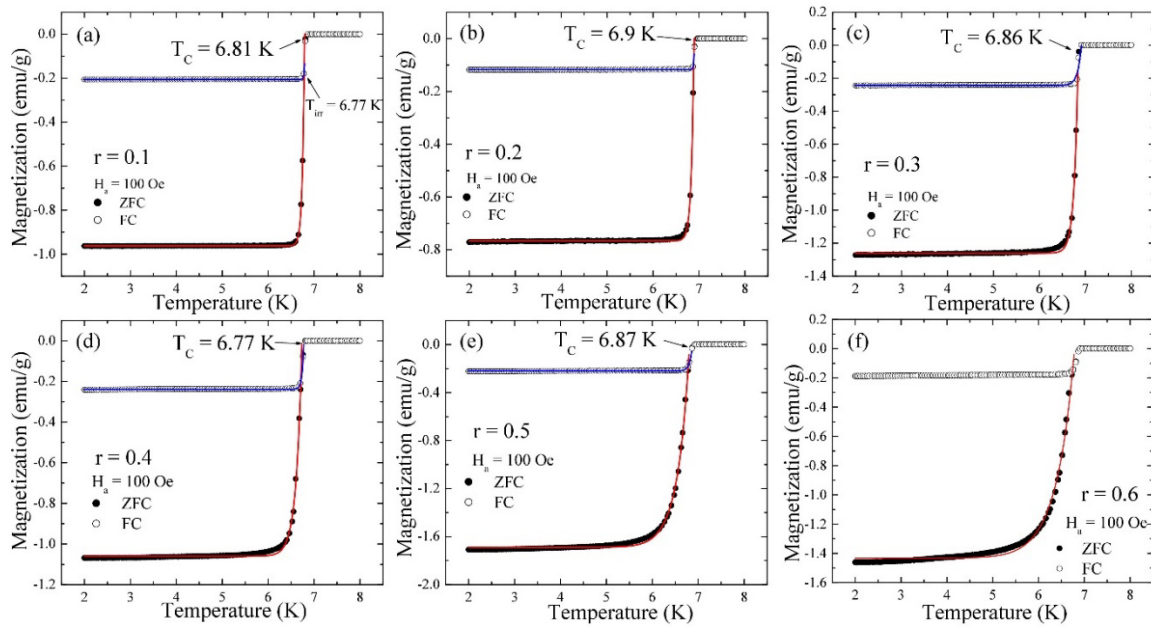

**Figure S3** (a)-(f) The isothermal magnetization  $M(H_a)$  loops measured at 2 K for  $r = 0.1$ -0.6 nanoalloys.

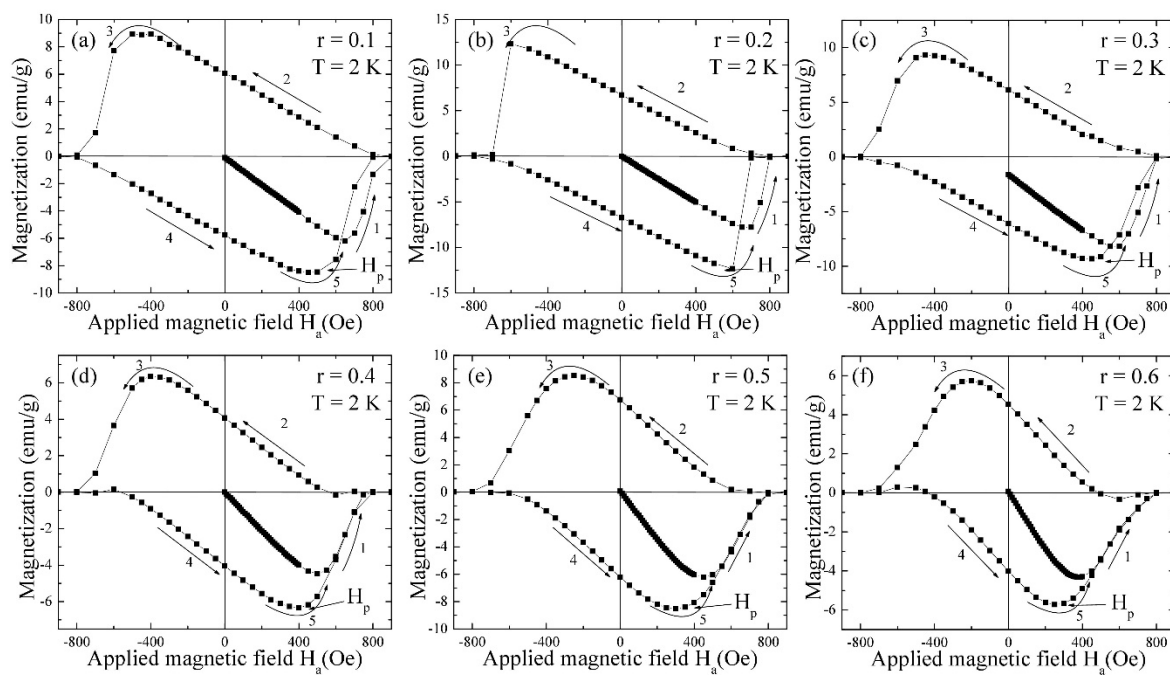

**Figure S4** (a)-(f) The  $M(H_a)$  loops were measured using protocol 0 Oe  $\rightarrow$  +900 Oe  $\rightarrow$  0 Oe field at a higher temperature up to 7 K for  $r = 0.1$ -0.6 nanoalloys.

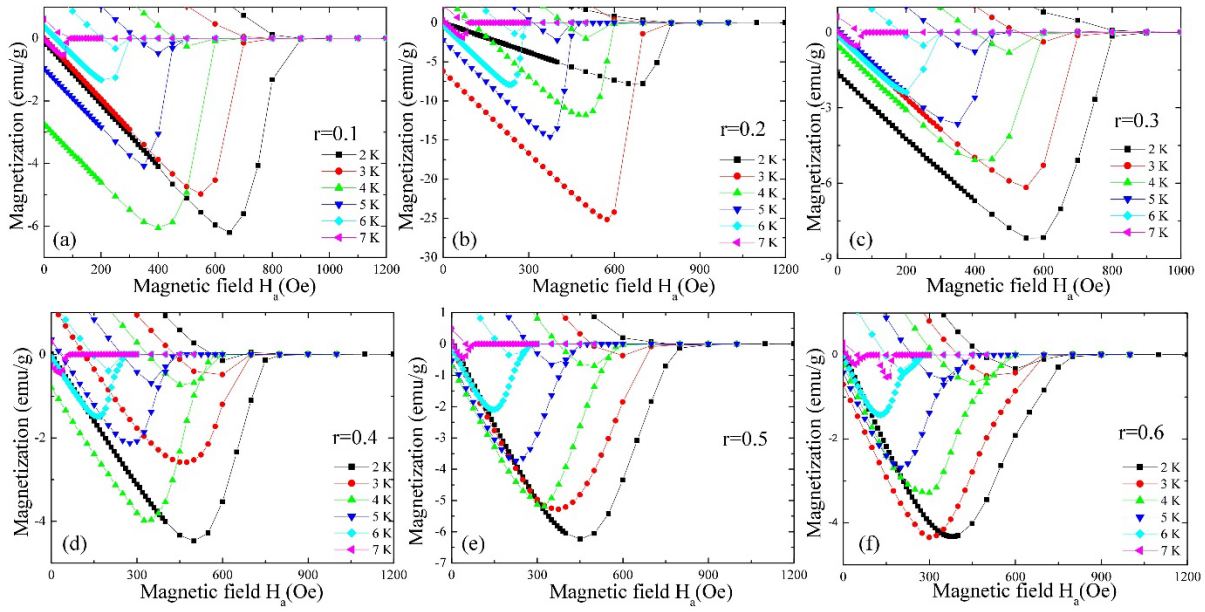

**Figure S5 (a)-(k)** Temperature dependence of ZFC magnetization  $M(T)$  measured between 2 to 8 K with different external magnetic fields varying from 10 to 700 Oe for all  $\text{Sn}_r\text{Pb}_{1-r}$  bimetallic nanoalloys.

The solid curve presents the fitted curve of the modified London expression to the data.

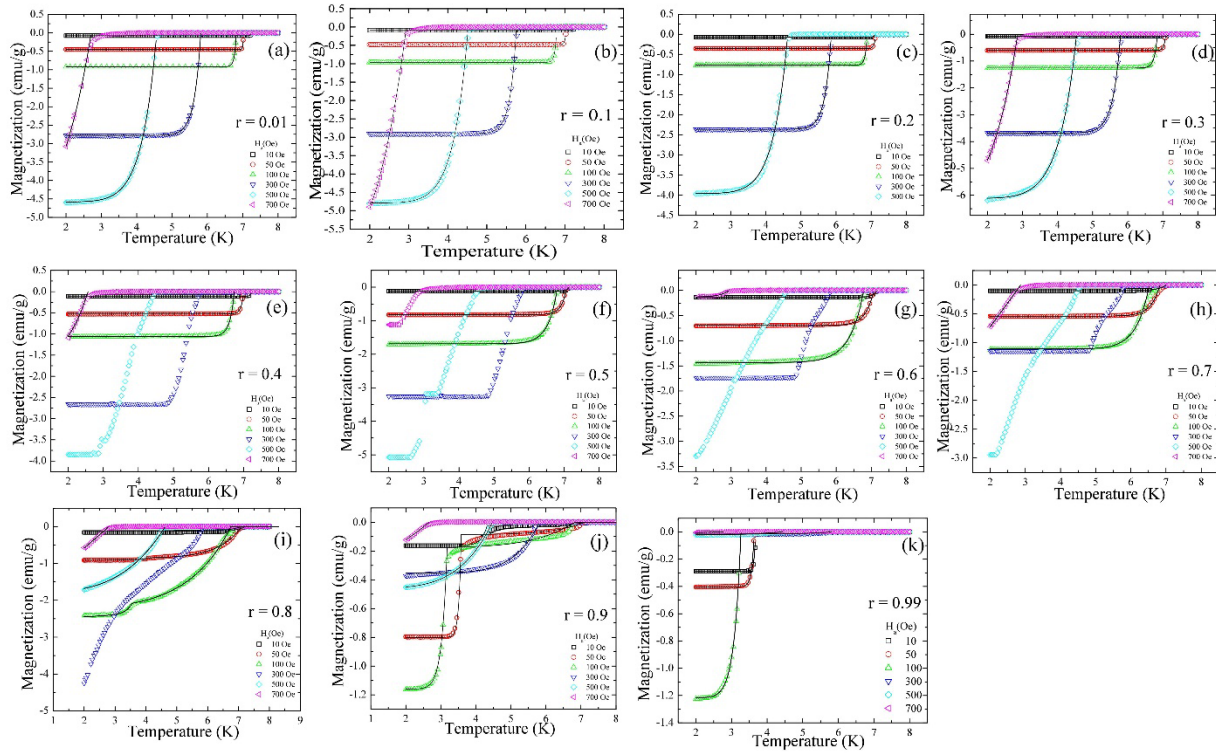

Supplement: s1 [file s1]
